# Supplementary material
Source: PubMed Central journal article supplement (PMC10600717)
Supplement: jamasurg-e235210-s001.pdf [file jamasurg-e235210-s001.pdf]

1

**Contents of supplementary materials**

| Contents                  | Numbered pages |
|---------------------------|----------------|
| Study protocol            | 1-21           |
| Statistical analysis plan | 22-26          |
| Informed consent          | 27-32          |

## 2 **Protocol**

Version no. v 1.0  
Version date 2018-12-01

3

Protocol title: Effect of laparoscopic versus open pancreaticoduodenectomy on overall survival in patients with resectable pancreatic cancer (TJDBPS07): A study protocol for a multicenter, randomized controlled clinical trial

Protocol number: TJDBPS07

Investigating institute: Tongji Hospital, Tongji Medical College, Huazhong University of Science and Technology

Statistical analysis institute: Tongji Medical College, Huazhong University of Science and Technology

4    **STATEMENT OF COMPLIANCE**

5    The trial will be conducted in accordance with the applicable regulation–International Conference on  
6    Harmonization Good Clinical Practice (ICH GCP). The principal investigator will assure that no  
7    deviation from, or changes to the protocol will take place without prior agreement via documented  
8    approval from the institutional review board (IRB), except where necessary to eliminate an immediate  
9    hazard(s) to the trial participants. All personnel involved in this study have completed the Human  
10   Subjects Protection and ICH GCP training.

11   The protocol, informed consent form(s), recruitment materials, and all participant materials will be  
12   submitted to the IRB for review and approval. Approval of both the protocol and the consent form must  
13   be obtained before any participant is enrolled. Any amendment to the protocol will require review and  
14   approval by the IRB before the changes can be implemented in the study. All changes to the consent  
15   form will be approved by IRB; a determination will be made regarding whether new consent needs to  
16   be obtained from participants who have already provided consent, using a previously approved consent  
17   form.

|                         |                                                                                                                                                                                                                                                                                                                                                                                                                                                                                                                                                                |
|-------------------------|----------------------------------------------------------------------------------------------------------------------------------------------------------------------------------------------------------------------------------------------------------------------------------------------------------------------------------------------------------------------------------------------------------------------------------------------------------------------------------------------------------------------------------------------------------------|
| Protocol title          | Effect of laparoscopic versus open pancreaticoduodenectomy on overall survival in patients with resectable pancreatic cancer (TJDBPS07): A study protocol for a multicenter, randomized controlled clinical trial                                                                                                                                                                                                                                                                                                                                              |
| Study number:           | NCT03785743                                                                                                                                                                                                                                                                                                                                                                                                                                                                                                                                                    |
| Principal investigator: | Renyi Qin                                                                                                                                                                                                                                                                                                                                                                                                                                                                                                                                                      |
| Study center(s):        | 10                                                                                                                                                                                                                                                                                                                                                                                                                                                                                                                                                             |
| Study objective(s):     | The broad goal of this trial is to evaluate the safety and efficacy of laparoscopic pancreaticoduodenectomy (LPD) and open pancreaticoduodenectomy (OPD) procedures. The main hypothesis is that LPD is non-inferior to OPD procedures in terms of overall survival in the treatment of pancreatic cancer. The primary outcome variable is the postoperative length of stay. The secondary outcome variables include estimated blood loss, operation time, complication rate, R0 resection rate, comprehensive complication index (CCI), and overall survival. |
| Study design:           | This is a prospective, randomized, controlled, multicenter trial with two treatment arms: LPD versus OPD                                                                                                                                                                                                                                                                                                                                                                                                                                                       |
| Number of subjects:     | 200 patients                                                                                                                                                                                                                                                                                                                                                                                                                                                                                                                                                   |
| Study population:       | All pancreatic cancer patients with an indication for pancreaticoduodenectomy                                                                                                                                                                                                                                                                                                                                                                                                                                                                                  |
| Surgical methods        | Group 1: LPD<br>Group 2: OPD                                                                                                                                                                                                                                                                                                                                                                                                                                                                                                                                   |
| Study duration          | 7 years                                                                                                                                                                                                                                                                                                                                                                                                                                                                                                                                                        |
| Outcomes                | The primary outcome variable is the 5-year overall survival rate.<br>The secondary outcome variables include the overall survival, 3-year and 5-year disease-free survival rates, 90-day mortality rate, incidence of severe perioperative complications (Clavien–Dindo grade $\geq$ III), length of stay, estimated blood loss, and operation time.                                                                                                                                                                                                           |
| Eligibility             | <b>Inclusion criteria</b><br>1) Age between 18 years and 75 years.<br>2) Histologically confirmed or clinically diagnosed pancreatic cancer by an MDT without histopathologic evidence.<br>3) Patients feasible to undergo both LPD and OPD according to MDT evaluations.<br>4) Patients understanding and willing to comply with this trial.                                                                                                                                                                                                                  |

|                             |                                                                                                                                                                                                                                                                                                                                                                                                                                                                                                                                                                                                                                                                                                                                                                                                                                                                                                                                                                                                                                                                                                                                                                                                                                                                                                                                                                                                                                                                         |
|-----------------------------|-------------------------------------------------------------------------------------------------------------------------------------------------------------------------------------------------------------------------------------------------------------------------------------------------------------------------------------------------------------------------------------------------------------------------------------------------------------------------------------------------------------------------------------------------------------------------------------------------------------------------------------------------------------------------------------------------------------------------------------------------------------------------------------------------------------------------------------------------------------------------------------------------------------------------------------------------------------------------------------------------------------------------------------------------------------------------------------------------------------------------------------------------------------------------------------------------------------------------------------------------------------------------------------------------------------------------------------------------------------------------------------------------------------------------------------------------------------------------|
|                             | <p>5) Provision of written informed consent before patient registration.</p> <p>6) Patients meeting the curative treatment intent in accordance with clinical guidelines.</p> <p><b>Exclusion criteria</b></p> <p>1) Patients with distant metastases, including peritoneal, liver, distant lymph node metastases, and involvement of other organs.</p> <p>2) Patients requiring left, central or total pancreatectomy or other palliative surgery.</p> <p>3) Preoperative American Society of Anesthesiologists score <math>\geq 4</math>.</p> <p>4) History of other malignant disease.</p> <p>5) Pregnant or breast-feeding women.</p> <p>6) Patients with serious mental disorders.</p> <p>7) Patients treated with neoadjuvant therapy.</p> <p>8) Patients with vascular invasion and requiring vascular resection as evaluated by the MDT team according to abdominal imaging data.</p> <p>9) Body mass index <math>&gt; 35</math> kg/m<sup>2</sup>.</p> <p>10) Patients participating in any other clinical trials within 3 months.</p>                                                                                                                                                                                                                                                                                                                                                                                                                          |
| <p>Statistical methods:</p> | <p><b>Hypothesis:</b> Let <math>u_1</math> denote the effect size in the LPD group and <math>u_2</math> denote the effect size in the OPD group. The statistical hypothesis is</p> <p><math>H_0 : P1-P2 &gt; -10\%</math></p> <p><math>H_1 : P1-P2 \leq -10\%</math></p> <p><math>\alpha = 0.05</math>(two-sided)</p> <p><b>General consideration:</b></p> <p>(1) All statistical tests will be two-sided, with <math>P &lt; 0.05</math> considered to represent a statistically significant difference and 95% confidence intervals (CIs). All data will be analyzed using SAS version 9.4 (SAS Institute Inc., Cary, NC, USA).</p> <p>(2) Quantitative data will be described by the number of cases, means, standard deviations, medians, interquartile ranges, and ranges. Qualitative data will be described as frequencies, constituent ratios, or percentages. In the effect research and comparison, we will select appropriate data sets according to specific research goals with the appropriate statistical analysis methods. In the intergroup comparison of qualitative data, we will use the <math>\chi^2</math> test; the independent samples <math>t</math>-test will be used to compare quantitative data between the groups.</p> <p>(3) Before data locking, the data set will be determined by the principal investigators together with the biostatistician.</p> <p>(4) The SPIRIT checklist was referred to when writing this study protocol.</p> |

19

20

21 **1. INTRODUCTION**

22 Pancreatic cancer is estimated to rank ninth among the most common cancers and fourth among the leading  
23 causes of cancer deaths in the United States.<sup>1</sup> Surgery (laparotomy or minimally invasive surgery) is the  
24 only potentially curative and preferred treatment for patients with pancreatic malignant tumors.<sup>2</sup> Previously  
25 reported studies have indicated that adjuvant chemotherapy after radical surgery could significantly  
26 enhance the curative effect and achieve promising improvements in overall survival and disease-free  
27 survival for patients with resected pancreatic adenocarcinoma.<sup>3 4</sup> As recommended by the National  
28 Comprehensive Cancer Network (NCCN) Guidelines for Pancreatic Adenocarcinoma (version 1.2019) and  
29 the Pancreatic Cancer Committee of the Chinese Anti-Cancer Association, radical surgery followed by  
30 adjuvant chemotherapy based on gemcitabine is a preferred and effective treatment strategy for patients  
31 with pancreatic cancer.<sup>5 6</sup>

32 Pancreaticoduodenectomy (PD), the standard procedure for resectable masses in the periampullary region,  
33 including pancreatic head cancer, is considered one of the subtlest abdominal surgical procedures, involving  
34 both difficult resection and complex reconstruction procedures.<sup>7</sup> Since first performed and introduced by  
35 Gagner et al. in 1994, laparoscopic PD (LPD) has rapidly and widely spread owing to its potential technical  
36 advantages focusing on the precision of movements and three-dimensional view.<sup>8 9</sup> Recently, an increasing  
37 number of studies, including some large-scale multicenter randomized controlled trials have reported the  
38 safety and feasibility of LPD for the treatment of periampullary tumors.<sup>10 11</sup> In addition, several reports have  
39 focused on the comparison of LPD and open PD (OPD) in the treatment of pancreatic cancer. The results  
40 suggest that LPD yielded equivalent 5-year overall survival and superior perioperative clinical outcomes in  
41 comparison to OPD.<sup>12</sup> However, these reports were from retrospective studies, which are associated with  
42 inherent limitations such as patient selection biases, missing or incomplete data, and variables that were  
43 unaccounted for, making the results difficult to interpret definitively.

44 Accordingly, it is imperative to conduct prospective large-scale multicenter randomized controlled trials to  
45 analyze outcomes of interest and obtain high-level evidence. This TJDBPS07 trial aims to compare the  
46 long-term oncological outcomes and short-term surgical outcomes of LPD and OPD in the treatment of  
47 pancreatic cancer.

48

49 **2. STUDY OBJECTIVES**

50 The primary objective of this trial is to test the hypothesis that LPD is non-inferior to OPD procedures for  
51 the treatment of pancreatic cancer in terms of safety and feasibility, based on a composite primary endpoint  
52 of the 5-year overall survival rate. Simultaneously, the secondary endpoints, including the 5-year  
53 disease-free survival rate, 90-day mortality rate, incidence of severe perioperative complications (Clavien–  
54 Dindo grade  $\geq$ III), length of stay, estimated blood loss, and operation time, are set to assess the  
55 patient-related benefits of LPD for pancreatic cancer compared with OPD.

56

57 **3. OVERALL DESIGN AND PLAN OF THE STUDY**

58 **3.1 Design**

59 The TJDBPS07 trial is characterized as a prospective, multicenter, randomized controlled, non-inferiority,  
60 and open labelled study with two parallel groups and a primary outcome of overall survival.

61

62 **3.2 Number of subjects**

63 This study is a randomized parallel controlled non-inferiority design clinical trial with a 1:1 ratio between  
64 groups. With reference to the results of previously published clinical studies, the 3-year overall survival  
65 rates for patients with malignant pancreatic head tumors who underwent OPD and LPD are 31% and 41%,  
66 respectively. Assuming a non-inferiority cut-off value of -10%, a one-sided significance level of 0.025, and  
67 that a 0.85 degree of power should be obtained, a total of 180 patients are required for the two groups (90  
68 patients in each group). Considering a drop-out rate of 10%, the sample size of the study was finally  
69 estimated to be 200 patients, with 100 patients in each group.

70

71 **3.3 Randomization**

72 We applied a stratified randomized block design for the 10 centers with a block number of four. The

73 randomization scheme was conceptualized using SAS version 9.3 (SAS Institute Inc., Cary, NC, USA).  
74 Randomization will be centralized through a computer-generated system and performed in a parallel  
75 fashion. A data manager who is blinded to the data analysis or patient enrolment will generate the  
76 randomization schedule. Allocation will be announced and handled by the study coordinators only after  
77 baseline assessment and patient consent to participate in the study have been secured. The randomization  
78 schedule will not be available to study recruiters or physicians. Allocation will be conducted by the  
79 independent data manager. Specifically, when appropriate patients are enrolled, the researcher will inform  
80 the data manager, and then the random number and exact treatment group will be returned simultaneously.

81

### 82 **3.4 Random number sequence**

83 Each subject in the study will be uniquely identified by a 7-digit subject number with Arabic numerals. The  
84 subject number will start with 07, plus the 2-digit center number of the center where he/she is located,  
85 followed by the 3-digit subject number. For example, the number of the first enrolled subject at the first  
86 center is 0701001, and so on.

87

### 88 **3.5 Randomization table storage**

89 The randomization table will be generated by an independent statistician using the SAS statistical software,  
90 and the randomization parameters will be stored in the randomization table to ensure reproducibility of the  
91 randomization process. The randomization table and the number of seeds will be stored as randomization  
92 files at the ethics office of the group leader.

93

### 94 **3.6 Image evaluation**

95 Efficacy evaluation in this study is divided into evaluation by the investigators of the research center and  
96 evaluation by an independent reading committee (IRC). During the study period, a researcher authorized by  
97 the research center will evaluate and determine the continuous use of drugs among the subjects. Disease  
98 progression assessed by the investigator will be reviewed and confirmed by the IRC. Before the IRC  
99 confirms disease progression, the subject should be kept in the study as much as possible, unless the  
100 investigator believes that continuing the study confers a greater risk than benefit to the subject or that the  
101 patient has already experienced obvious tumor progression. For instance, the emergence of obvious new  
102 malignant lesions, regardless of the results of target and non-target lesions, will not affect the final results  
103 of efficacy evaluation. Among subjects who withdraw halfway without being assessed for the primary  
104 efficacy indicators, the primary endpoint still needs to be followed up (unless the subject withdraws  
105 informed consent or has begun another form of anti-tumor therapy). For more information on operations  
106 related to the IRC evaluation, please refer to the “Central Imaging Operation Manual” provided by the  
107 sponsor.

108

### 109 **3.7 Study duration**

110 The period of the study begins when the first patient signs the informed consent and ends 3 calendar years  
111 after the last enrolled patient has undergone surgery. The end of the study is defined as 3 calendar years  
112 after the last patient receives surgical treatment. Before the end of the study, the investigator can remove  
113 patients who will not continue to benefit from the study. At the end of the study, patients who the  
114 investigator believes can still benefit from the treatment in this study will be provided with the possibility  
115 of extending the treatment outside the trial protocol.

116

### 117 **3.8 Blinding**

118 Patients and surgeons are unblinded to the treatment, while the data collectors, outcome assessors, and data  
119 analysts are blinded. The primary endpoint of this study is the overall survival and cannot be influenced by  
120 the data collectors, outcome assessors, and data analysts who are blinded and are also not involved in the  
121 preoperative, perioperative, and postoperative management of the patients, and thus have no determination  
122 of the overall survival. The surgeons will only perform the surgery and will not be involved in  
123 postoperative management. The patients have little influence concerning the length of stay since they will  
124 be discharged immediately once the discharge criteria are met. Most of the criteria are objective conditions  
125 including a lack of need for any intravenous infusion, a fully healed incision without infection,

126 well-functioning major organs, and near-normal hematological parameters. These conditions will not be  
127 influenced by the patients even in the absence of blinding.

128

#### 129 **4. SUBJECT SELECTION AND WITHDRAWAL**

130 Subjects must meet the following criteria before they are allowed to participate in this study. All medical or  
131 non-medical conditions of each enrolled subject are within the consideration range of whether they meet the  
132 test standards or not. The investigator should review, confirm, and record whether the subjects are suitable  
133 to participate in this study before they are included.

134

##### 135 **4.1 Inclusion criteria**

- 136 1) Age between 18 years and 75 years.
- 137 2) Histologically confirmed or clinically diagnosed pancreatic cancer by an MDT without  
138 histopathologic evidence.
- 139 3) Patients feasible to undergo both LPD and OPD according to MDT evaluations.
- 140 4) Patients understanding and willing to comply with this trial.
- 141 5) Provision of written informed consent before patient registration.
- 142 6) Patients meeting the curative treatment intent in accordance with clinical guidelines.

143

##### 144 **4.2 Exclusion criteria**

- 145 1) Patients with distant metastases, including peritoneal, liver, distant lymph node metastases, and  
146 involvement of other organs.
- 147 2) Patients requiring left, central or total pancreatectomy or other palliative surgery.
- 148 3) Preoperative American Society of Anesthesiologists score  $\geq 4$ .
- 149 4) History of other malignant disease.
- 150 5) Pregnant or breast-feeding women.
- 151 6) Patients with serious mental disorders.
- 152 7) Patients treated with neoadjuvant therapy.
- 153 8) Patients with vascular invasion and requiring vascular resection as evaluated by the MDT team  
154 according to abdominal imaging data.
- 155 9) Body mass index  $> 35$  kg/m<sup>2</sup>.
- 156 10) Patients participating in any other clinical trials within 3 months.

157

##### 158 **4.3 Loss to visit**

159 If a subject misses one scheduled follow-up and the researcher is unable to establish contact within 7 days,  
160 this will be considered a loss to visit.

161 If the subject is unable to return during the specified visit period, the investigator should take the following  
162 measures. Before confirming that the subject is lost to visit, the investigator or authorized researcher shall  
163 try his best to contact the subject (if possible, make more than 3 calls or send messages via SMS or  
164 WeChat), and record efforts made in the subject's medical history or research files. The researcher should  
165 try to contact the subject and reschedule a visit within 7 days. The researcher should emphasize to the  
166 subject the importance of the return visit according to the plan, and at the same time determine the subject's  
167 willingness to continue participating in the trial. If the subject is still unable to establish contact, this will be  
168 considered a withdrawal, and the reason for withdrawal is recorded as loss to visit.



169

#### 170 4.4 Withdrawal

171 The subject has the right to withdraw from the study at any time for any reason, and the researcher can also  
172 decide to withdraw the subject from the study at any time. If such withdrawal occurs or if the subject fails  
173 to return for follow-up evaluation, the investigator must determine the main reason for the early withdrawal  
174 and record this information. Subjects can withdraw from the study for any of the following reasons:

- 175 1. The implemented treatment is proven to violate the study protocol
- 176 2. Incomplete data leading to effects on the estimation of efficacy or safety
- 177 3. Inability to tolerate surgery and subsequent adjuvant therapy
- 178 4. Patients voluntarily ask to quit for personal reasons
- 179 5. Cases histologically confirmed as not pancreatic cancer
- 180 6. Cases intraoperatively/postoperatively confirmed to be locally advanced
- 181 7. Patients intraoperatively/postoperatively confirmed to have distant metastases
- 182 8. Loss to visit

183 If the subject withdraws from the study, a complete final clinical evaluation of the patient should be  
184 performed. If subjects withdraw from the study due to adverse events (AEs) or abnormal laboratory test  
185 results, these specific events need to be recorded in detail.

186

### 187 5. TREATMENT TECHNIQUES

#### 188 5.1 LPD techniques

189 The standard operative technique is described as follows. Any small variations according to the surgeon's  
190 preference, such as a different order in surgical steps, a variation in approach, or pancreatic anastomosis  
191 technique, will be allowed but must be recorded authentically in the case record form.

192 All procedures are to be performed by two regularly trained pancreatic surgeons. Patients will be under  
193 general anesthesia and placed in a supine position; an anti-Trendelenburg position (10–30°) may be used, if  
194 necessary. The right arm will be placed along the body and the left arm at 90° abduction for accessing  
195 arterial monitoring. A 12-mm trocar (Versaport™; Covidien, Dublin, Ireland) will be placed slightly lower  
196 than the umbilicus, and pneumoperitoneum established. Two 12-mm trocars will then be placed, both  
197 lateral to the first trocar on the right and left in the midclavicular lines. Another two 5-mm trocars will be  
198 placed at the right and left infracostal arches on both sides of the anterior axillary line (3–4 cm subcostally).  
199 Diagnostic laparoscopy will be performed to rule out any abnormalities and metastasis. The cystic duct and  
200 artery will be transected, and the gallbladder will be moved and set aside. The round ligament will be  
201 retracted to the anterior abdominal wall, possibly with a suture, according to the surgeons' experience. The  
202 lesser sac will be opened, and a Kocher manoeuvre will be performed, thereby, mobilising the duodenum.  
203 The gastro-epiploic artery and vein will be transected. The distal stomach will be transected on the left side  
204 of the pylorus with an endostapler (Endo GIA™ Auto Suture, Covidien) after temporarily removing the  
205 nasogastric tube. The common hepatic arteries on the inferior border of the pancreas will be suspended with  
206 a rubber band. Lymph node station 8a will be dissected. Subsequently, the right gastric artery and  
207 gastroduodenal artery will be ligated and transected with at least two Hem-o-lok clips (WECK® Polymer  
208 Ligation System; Teleflex Incorporated, PA, USA) and one firm ligation (Ethicon®; Johnson & Johnson,  
209 NJ, USA). The portal vein (PV) will be identified at the superior border of the pancreatic neck, and the  
210 superior mesenteric vein (SMV) will be identified at the inferior border of the pancreas. A tunnel will be  
211 created posterior to the pancreatic neck and anterior to the SMV and PV. The pancreas will be slung with a  
212 vascular blocking band and then transected with ultrasonic shears (THUNDERBEAT; Olympus America  
213 Inc., PA, USA), while the pancreatic duct will be transected sharply with scissors and intubated to ensure  
214 patency. The jejunum will be transected approximately 15 cm from the ligament of Treitz with an  
215 endostapler (Endo GIA™ Auto Suture, Covidien). After retracting the duodenum and jejunum to the right  
216 side of the mesenteric root, the duodenum will be stretched and the uncinate process mobilized. The  
217 branches of the SMA and SMV will be carefully handled until the uncinate process is fully dissected.  
218 Retroportal lymph nodes will be resected according to the International Study Group on Pancreatic Surgery  
219 guidelines.<sup>18</sup> The common hepatic duct will be tunnelled and transected for anastomosis.

220 **Preparation of the pancreatic stump and jejunal loop:** The pancreatic stump remnant will be dissected

221 to approximately 0.5 cm (no more than 1.0 cm) in length, and careful hemostasis will be established with  
222 ultrasonic shears or absorbable sutures. A size 6–8 Fr plastic catheter will then be inserted as a stent into the  
223 pancreatic duct remnant to prevent pancreatic duct stenosis after suture placement. The jejunal limb will be  
224 brought up to the right of the middle colic vessels in a retrocolic manner, and the blind end will be placed  
225 near the pancreatic remnant. Negative resection margin status on the frozen section of the specimen will be  
226 confirmed before intracorporeal reconstruction if malignancy is suspected.

227 **Pancreaticojejunal anastomosis:** An embedding end-to-side pancreaticojejunal anastomosis, including  
228 four layers of mattress sutures, will be constructed.<sup>19</sup> The first layer of the anastomosis will be created  
229 between the posterior wall of the pancreatic stump and the posterior seromuscular layer of the jejunum.  
230 Two completely transpancreatic 4-0 prolene (Premilene; B. Braun Medical Ltd., Sheffield, UK) mattress  
231 sutures will be placed at a point approximately 0.2 cm from the superior and inferior edges of the main  
232 pancreatic duct, respectively. The most critical surgical step in the placement of the first and second  
233 mattress sutures will be interlocking them in the posterior wall of the jejunum. Care should be taken to  
234 pre-set the sutures to avoid passing them through or injuring the main pancreatic duct. Both mattress  
235 sutures will be preplaced approximately 0.5 cm from the cut edge of the pancreatic remnant. The number of  
236 these sutures varies depending on the size of the pancreatic duct but typically ranges from two to four  
237 sutures. After a small, full-thickness jejunotomy is created in line with the pancreatic duct, the second layer  
238 of the anastomosis will be created between the posterior wall of the pancreatic stump and the posterior wall  
239 of the small jejunal hole. Two completely transpancreatic 4-0 prolene mattress sutures will be placed  
240 following the first two sutures, while a full-thickness mattress suture in the posterior wall of the small hole  
241 will be placed in the jejunum approximately 0.2 cm from the edge. The third and fourth mattress sutures  
242 will be interlocked in the posterior wall of the jejunal hole. The posterior wall of the jejunal loop will then  
243 be tightly anastomosed with the posterior wall of the pancreatic stump without any remaining suture  
244 intervals. The third layer of the anastomosis will be created between the anterior wall of the pancreatic  
245 stump and the anterior wall of the jejunum. Two incompletely transpancreatic interlocking 4-0 prolene  
246 mattress sutures will be placed as described for the second layer of the anastomosis. However, the mattress  
247 sutures will not completely penetrate the pancreatic parenchyma but only enter the tissue halfway. The fifth  
248 and sixth mattress sutures are supposed to interlock in the anterior wall of the jejunal hole. The fourth layer  
249 of the anastomosis will be created between the anterior wall of the pancreatic stump and the anterior wall of  
250 the jejunum. Four incompletely transpancreatic interrupting 4-0 prolene mattress sutures will be placed to  
251 close the gaps in the superoinferior margin of the anastomosis to strengthen the sutures on its anterior wall,  
252 achieving a pancreatico-enteric anastomosis. Approximately 10 cm distally, an end-to-side  
253 hepaticojejunostomy will be constructed with running (bile duct dilatation of >5 mm) or interrupted (bile  
254 duct dilatation of ≤5 mm) sutures (Novosyn; B. Braun Medical Ltd.). Approximately 40 cm distal to the  
255 biliary anastomosis, an antecolic side-to-side gastroenterostomy will be created with the staple technique,  
256 and two layers of running 3-0 sutures (Novosyn; B. Braun Medical Ltd.) will be used to close the gastric  
257 stump. Two 27 Fr surgical drains will be placed through the foramen of Winslow and the upper region of  
258 the pancreaticojejunal stoma. After achieving hemostatic control, the trocars will be removed. The  
259 specimen will be extracted through an upper-middle incision, which will be subsequently closed in layers  
260 together with the closure of the trocars. A video clip for illustrative purposes of the basic laparoscopic  
261 surgical procedure is available upon request.

262

## 263 5.2 OPD techniques

264 OPD will be performed by the same group of surgeons. A right-sided rectus muscle abdominal incision is  
265 preferred for better exposure. The key steps are similar to those taken in the LPD group. Since outcomes of  
266 OPD worldwide are promising and convincing, the surgical technique in the OPD arm reflects their usual  
267 practice; also, the anastomoses will be performed according to the protocol of each center. Procedural  
268 variations according to the surgeon's preferences are allowed but must be recorded on the case record form.  
269 Two surgical drains will be placed as described in the LPD procedure.

270

## 271 5.3 Conversion from LPD to OPD

272 Conversion is defined in any patient in the LPD group for whom a skin incision is used for reasons other  
273 than trocar placement or specimen removal. The data of subjects allocated to LPD who undergo  
274 intraoperative conversion to OPD will be analyzed in the LPD group according to intention-to-treat (ITT)  
275 principles. Reasons for conversion should be carefully recorded in the surgical record.

276

277 **5.4 Postoperative management**

278 Postoperatively, antibiotics will be administered in addition to either parenteral or enteral nutrition.  
279 Somatostatin analogues are not routinely used for preventing postoperative pancreatic fistula (POPF). The  
280 abdominal drains will be kept in place for observation and removed if they are not productive and/or the  
281 presence of a pancreatic fistula or bile leakage is excluded. Amylase level determination in the drains will  
282 be performed on the third postoperative day or when a fistula is suspected following the criteria of the  
283 International Study Group of Pancreatic Fistula (ISGPF). Information regarding the management of  
284 pancreatic fistula, including antibiotic administration, enteral or parenteral nutrition, administration of  
285 therapeutic somatostatin analogues, and percutaneous or endoscopic interventional drainage, will be  
286 recorded. Patients will be discharged when the following criteria are met: (1) no need for intravenous  
287 infusion, (2) able to ingest solid or semisolid food, (3) no need for analgesics or fully comforted by orally  
288 analgesics, (4) incision is fully healed without infection, (5) able to get out of bed without assistance, (6)  
289 can walk at least 250 meters on a flat floor, and (7) major organs functioning well and near-normal  
290 hematological parameters. The operating surgeons will not be involved in the postoperative management,  
291 and hence, cannot influence the discharge of the patients.

292

293 **5.5 Postoperative adjuvant treatment**

294 5.5.1 Indications for postoperative adjuvant chemotherapy

295 After completing surgical treatment, subjects pathologically diagnosed with pancreatic ductal  
296 adenocarcinoma should receive postoperative adjuvant chemotherapy in accordance with the NCCN  
297 recommendation.<sup>5</sup>

298

299 5.2.2 Postoperative adjuvant chemotherapy procedures

300 In this study, gemcitabine-based chemotherapy will be recommended. The adjuvant chemotherapy cycle  
301 lasts for six months (six months after surgery). Based on the patient's physical strength and tolerance, the  
302 first chemotherapy regimen should be initiated within 8 weeks after surgery, and then administered  
303 regularly.

304 During chemotherapy, the follow-up plan should be used to assess whether there is tumor recurrence. If  
305 tumor recurrence occurs during chemotherapy, the adjuvant chemotherapy regimen in this study should be  
306 stopped, and each participating research center should determine its own follow-up treatment plan based on  
307 clinical practice. Information regarding tumor recurrence and the follow-up treatment plan should be  
308 recorded in the case report form (CRF). If there is no tumor recurrence during chemotherapy, adjuvant  
309 chemotherapy should be completed within six months. The presence of tumor recurrence should be  
310 continuously evaluated according to the follow-up plan.

311 Written informed consent should be obtained prior to adjuvant chemotherapy. Patients who refuse  
312 postoperative adjuvant chemotherapy or have not completed the entire adjuvant chemotherapy cycle will  
313 not be considered as discontinued cases in this study; however, details and the reason should be recorded in  
314 the CRF.

315 Adjuvant chemotherapy, toxic reactions, and intolerance dose adjustment principles should follow the  
316 published drug toxicity and dose adjustment guidelines for each chemotherapy regimen, which are not  
317 explained in detail in this protocol.

318

319 5.2.3 Safety evaluation indexes of postoperative adjuvant chemotherapy

320 Before and after each postoperative adjuvant chemotherapy cycle, the researcher should immediately fill in  
321 the safety evaluation indicators for the study participants. The specific contents include:

- 322 1. Physical state (Eastern Cooperative Oncology Group [ECOG] score);  
323 2. Subjective and objective state (according to the Common Terminology Criteria for Adverse Events  
324 [CTCAE] version 3.0 abbreviated record);  
325 3. Results of blood tests:

- 326 • Peripheral venous blood evaluation: white blood cell count, hemoglobin concentration, and  
327 platelet count
  - 328 • Blood biochemistry parameters: levels of albumin, sodium, potassium, total bilirubin,  
329 aspartate transaminase, alanine transaminase, and creatinine
  - 330 • Serum tumor markers: carbohydrate antigen 19-9, cancer antigen 125, carcinoembryonic  
331 antigen levels
- 332 4. If necessary, the following safety assessment items should be implemented during chemotherapy (please  
333 refer to CTCAE version 3.0):
- 334 • Neurotoxicity
  - 335 • Cardiovascular toxicity (cardiotoxicity, ischemic heart disease, etc.)
  - 336 • Bone marrow suppression and infection caused by immune dysfunction
  - 337 • Other(s)

338

## 339 6. ENDPOINTS

### 340 6.1 Primary endpoints

341 The primary outcome is the 5-year overall survival rate.

342

### 343 6.2 Secondary outcome measures

344 The secondary outcomes include the following variables:

- 345 1. Long-term outcomes: the 3-year overall survival rate, 5-year disease-free survival rate, and 3-year  
346 disease-free survival rate;
- 347 2. Intraoperative-related indicators: operation time, intraoperative blood loss, intraoperative blood  
348 transfusion, pancreatojejunostomy, gastrointestinal anastomosis, gastrointestinal anastomosis time, and  
349 pancreatic duct diameter;
- 350 3. Intraoperative complications: bile duct injury and nerve injury;
- 351 4. Perioperative indicators: postoperative hospital stay, ICU stay, time to get out of bed, time to resumption  
352 of oral feeding, time to removal of the drainage tube, postoperative drainage fluid volume, and amylase  
353 level;
- 354 5. Postoperative pain and analgesic consumption: visual analogue scale (VAS) pain score and analgesic  
355 consumption;
- 356 6. Postoperative complications: POPF,<sup>13</sup> postoperative hemorrhage (PPH),<sup>14</sup> delayed gastric emptying  
357 (DGE),<sup>15</sup> bile leakage,<sup>16</sup> systemic inflammatory response syndrome, abdominal infection, reoperation,  
358 Clavien–Dindo classification,<sup>17</sup> and comprehensive complication index score<sup>18</sup>;
- 359 7. Short-term outcomes: 30/90-day mortality rate and 90-day unplanned readmission rate;
- 360 8. Quality of life: changes in the patient’s quality of life before surgery, after discharge, and 6 months after  
361 surgery; and
- 362 9. Economic indicators: surgical expenses and hospitalization expenses.

363

## 364 7. RESEARCH PROCEDURES AND DATA COLLECTION

### 365 7.1 Screening period

366 The screening period starts with the signing of the informed consent form and ends with the completion of  
367 randomization or screening failure. Subjects who exit the study after signing the informed consent form and  
368 before the start of randomization will be regarded as cases of screening failure. Subjects must sign an  
369 informed consent form before proceeding with any screening procedures specified in the study.

370 The admission of patients will be discussed and decided by the pancreatic MDT of the participating centers.

371 All patients who are suspected to be enrolled will be evaluated by the following standard procedures:  
372 enhanced computed tomography (CT) scan of the upper abdomen (scanning interval, 1 mm), plain  
373 abdominal magnetic resonance scan + diffusion-weighted imaging to assess the extent of the disease and  
374 the condition of the pancreas. All patients with preoperative total bilirubin levels greater than 100 µmol/L  
375 will undergo percutaneous hepatic puncture drainage, and surgery will be considered when the total  
376 bilirubin concentration falls below 100 µmol/L. According to guidelines, pathological evidence does not  
377 need to be obtained in all patients before surgery.<sup>19</sup>

378

## 379 **7.2 Before surgery (visit 1)**

380 All patients will be subjected to preoperative gastrointestinal decompression, indwelling catheterization,  
381 gastrointestinal preparation, and indwelling central venous catheter placement. Postoperatively, patients  
382 will be subjected to intensive care, oxygen inhalation, blood glucose monitoring, central venous  
383 catheterization, postoperative monitoring of serological indicators, and weekly review of abdominal  
384 imaging. The following criteria must be met prior to discharge: no intravenous fluid treatment; eating  
385 semi-liquid or solid food; adequate pain relief through oral analgesic administration; adequate incision  
386 healing without signs of infection; adequate recovery of organ function; free movement (e.g., walking on a  
387 flat floor for at least 250 meters); and the major hematologic parameters are basically back to normal.

388 The preoperative evaluation and examination would involve: 1) chest X-ray examination, 2) plain CT  
389 scan/magnetic resonance imaging/positron emission tomography/abdominal ultrasound examination, and 3)  
390 12-lead electrocardiogram examination. Examination results obtained within 6 weeks before the operation  
391 will be deemed valid.

392 Within 10 days before the operation, the following must be completed:

- 393 1. Sign informed consent form;
- 394 2. Collect data regarding demographics, medical history, and baseline concomitant diseases;
- 395 3. Collect and record information about all concomitant medications (including prescription and  
396 non-prescription drugs) used in the current and past 12 weeks;
- 397 4. Life quality assessment;
- 398 5. ECOG score assessment;
- 399 6. Height (in cm) and weight (in kg) measurement;
- 400 7. Standard preoperative laboratory examinations; and
- 401 8. Screening for admission criteria, completion of randomization, and recording the results of  
402 randomization.

403

## 404 **7.3 Intraoperative (visit 2)**

405 The following will be completed during this visit:

- 406 1. Operation according to the results of randomization: LPD or OPD;
- 407 2. Record detailed information during and after the operation (including details of the operation,  
408 intraoperative complications, blood transfusion, and other special information related to the operation); and
- 409 3. Record histopathological information including surgical margin status (R0 resection rates), number of  
410 retrieved lymph nodes, number of positive lymph nodes, tumor location, size of the tumor, depth of  
411 invasion (T classification), lymph node status (N classification), American Joint Committee on Cancer  
412 pathological stage (eighth edition), and histological type.

413

## 414 **7.4 Short-term postoperative follow-up (visits 3–7)**

415 The following will be assessed at 1 day, 1 week, 1 month, 3 months, and 6 months after surgery:

- 416 1. Laboratory inspection indicators;
- 417 2. ECOG score;

- 418 3. Postoperative wound recovery and wound pain level (VAS pain score);  
419 4. Drainage of each drainage tube after operation;  
420 5. Postoperative recovery (getting out of bed, imported food, etc.);  
421 6. Weight;  
422 7. AEs;  
423 8. Concomitant medications; and  
424 9. Postoperative complications.

425

#### 426 **7.5 Long-term postoperative follow-up (visit 8)**

427 Each participant will be followed up every 3 months in the first year after surgery, and every 6 months from  
428 the second year onwards. Starting from the 6th month after surgery, follow-up will be carried out as  
429 follows:

- 430 1. Clinical evaluation including physical assessments (such as weight);  
431 2. Assessment of AEs related to chemotherapy;  
432 3. Histological confirmation of disease recurrence or metastasis to prove the existence of tumor recurrence  
433 or metastasis. Here, we will record the date of recurrence, location, and follow-up treatment; and  
434 4. The date of death will be recorded and every effort will be made to determine the cause of death (which  
435 may be related to disease or treatment).

436

### 437 **8. ADVERSE EVENTS**

#### 438 **8.1 Definitions of AEs**

439 An AE is defined as any adverse sign, symptom, or medical condition that occurs after a patient provides  
440 informed consent (or the deterioration of any pre-existing condition), regardless of its relation to treatment.

441 A treatment-related AE is defined as an AE that occurs after surgical treatment, but not before, or any  
442 aggravated AE that occurs after surgical treatment.

443 Information on the occurrence of AEs should be obtained through non-directed questioning of patients  
444 during the screening process after signing the informed consent form and at each visit in the study. AEs can  
445 also be detected voluntarily by patients during follow-up, or through physical examination, laboratory tests,  
446 or other evaluations. Each AE will be evaluated as much as possible to determine:

- 447 1. Severity classification (CTCAE grade 1–5);  
448 2. Starting and ending dates;  
449 3. Interrelationship with research and treatment;  
450 4. Measurements taken for research or the study treatment (none, temporary interruption, drug treatment,  
451 surgical intervention, unknown, or not applicable);  
452 5. Outcome (unrecovered/unrelieved, recovery/remission, recovery/remission but with  
453 sequelae, lethal, or unknown); and  
454 6. Whether it is a serious AE (SAE), as defined in section 8.4.

455

456 Once detected, any AE should be followed up until it is resolved or is adjudged to be permanent. At each  
457 follow-up or visit, any change in severity, the relationship with the study treatment, interventional measures,  
458 and the outcomes of its treatment should be evaluated.

459 During the treatment, the natural progression or recurrence of malignant tumors will be recorded as part of  
460 the efficacy evaluation and should not be reported as AEs/SAEs.

461 The severity of AEs will be graded in accordance with CTCAE version 4.0. If there is no certain AE in the  
462 CTCAE grading system, the severity of the event shall be graded according to grades 1–5: mild, moderate,  
463 severe, life-threatening, and death, respectively:

- 464 1. Mild: Slightly uncomfortable, but does not interfere with normal daily activities;
- 465 2. Moderate: Severe enough to reduce or affect the comfort of daily activities;
- 466 3. Severe: Unable to work or carry out normal daily activities;
- 467 4. Life-threatening: Indicates a direct threat to life; and
- 468 5. Death.

469

## 470 8.2 Definitions of intraoperative AEs

471 **(1) Intraoperative bleeding:** Any occurrence of relevant blood loss that resulted in an action by the  
472 surgeon, which was described in the surgeon's or anesthesiologist's report, or for which there is evidence of  
473 urgent transfusion therapy during surgery.

474 **(2) Injury of visceral organs or vessels:** Any injuries to abdominal organs described in the surgical  
475 report, requiring additional surgical procedures that were unrelated to the predefined procedures.

476 **(3) Anesthesia complications:** Any complications occurring during surgery related to anesthesia that  
477 induced the interruption of the surgery or changed the normal course of the procedures.

478 **(4) Conversion:** Any reasons for conversion surgery should be carefully reported.

479 **(5) Other complications:** Other events leading to a deviation from the normal operation course,  
480 reported by the surgeons or anesthesiologist.

481

## 482 8.3 Definitions of postoperative AEs

483 The following postoperative events will be detected and recorded:

484 **(1) Hemorrhage:** Any evidence of PPH, including intraluminal and intra-abdominal bleeding.  
485 Descriptions of clinical signs and symptoms or the need for transfusion should be recorded. Reports of  
486 radiological (digital subtraction angiography) or endoscopic examinations or any surgical procedures  
487 should be included (if needed).

488 **(2) POPF:** Drain amylase levels will be monitored after surgery; the detection and severity of  
489 pancreatic fistula will be classified according to the criteria of the ISGPF.

490 **(3) DGE:** DGE will be defined according to the guidelines put forward by the International Study  
491 Group of Pancreatic Surgery.

492 **(4) Bile leakage:** Bilirubin drainage will be monitored after surgery, and any elevation in bilirubin  
493 levels or bile present in the diagnostic puncture of the abdominal cavity will be recorded.

494 **(5) Wound infection:** Superficial or deep surgical site infections are both considered and should be  
495 reported in the medical records. Superficial infections are considered when the skin or subcutaneous tissue  
496 is involved, whereas deep infection is considered when extending into the fascial layer.

497 **(6) Intra-abdominal fluid collection/abscess:** Evidence of collection of fluid material, with or  
498 without the characteristics of an abscess, confirmed via ultrasound, CT scan, or contrast-enhanced CT scan.

499 **(7) Intestinal obstruction and ileus:** Reported diagnosis based on clinical examination and signs of  
500 intestinal dilatation on abdominal X-ray.

501 **(8) Wound hernia or dehiscence:** Hernia or separation that occurred through a surgical incision in the  
502 abdominal wall deriving either from laparotomy or trocar incisions. All available data will be considered  
503 from medical records.

504 **(9) Other complications:** These include surgery-related complications, not classified by any of the  
505 above, and deriving from all available patient records.

506

507 **8.4 Abnormal laboratory test results**

508 Abnormal laboratory test results that constitute AEs (considered to be clinically significant, leading to  
509 clinical symptoms or signs, requiring combined treatment, or adjustments of treatment) should be recorded.  
510 Diagnoses are to be reported instead of symptoms or signs. These events are to be followed up until they  
511 return to normal, or the reason for the abnormality is identified in sufficient detail. If a certain laboratory  
512 abnormality can correspond to the symptoms/signs of a known or reported AE, it is not necessary to  
513 separately record the abnormal laboratory test result as another event.

514 Laboratory abnormalities that do not meet the definition of an AE should not be reported as AEs. As per  
515 CTCAE version 4.03, an event of grade 3 or worse will not automatically be indicated as an SAE unless it  
516 meets the following criteria for SAEs and/or is deemed to be one based on the researcher's judgment.  
517 According to the provisions of the research protocol, this laboratory abnormality may require suspension of  
518 treatment or special intervention; however, it may still constitute an AE by definition.

519

520 **8.5 Serious AEs**

521 An SAE is defined by at least one of the following characteristics:

522 1. Causes death or threatens life at any time;

523 2. Causes permanent or severe disability, deformity, or dysfunction; and

524 3. Requires hospitalization or prolonged hospitalization, unless the hospitalization is for social reasons and  
525 training without any deterioration in the overall condition of the patient; routine treatment or monitoring of  
526 the indications studied, without occurrence of any deterioration; or treatment for patients that do not meet  
527 any of the above SAE definitions and does not lead to hospitalization.

528

529 **8.6 Report of serious AEs**

530 To ensure the safety of patients, any SAE occurring after the patient has given written consent until at least  
531 30 days after the patient has stopped treatment, regardless of whether it is suspected to be causally related  
532 to the trial, must be reported to the Ethics Committee of the Affiliated Tongji Hospital of Tongji Medical  
533 College of Huazhong University of Science and Technology within 48 hours of being informed. Any SAE  
534 that occurs during the 30-day period or after a confirmed and reported SAE will only be reported again if  
535 the investigator suspects a causal relationship with the study treatment. SAEs that occur at different time  
536 periods, or SAEs that are considered completely unrelated to previously reported events should be reported  
537 separately as new events.

538 All SAE information will be collected and recorded in the SAE report form. The investigator must evaluate  
539 and record the correlations between SAEs and the treatments.

540 When filling in the follow-up information, the follow-up information should be sent to the same contact  
541 person as the SAE report.

542

543 **8.7 Acquisition of AE information**

544 At each follow-up, the patient will be asked a standard unguided question to understand the patient's health  
545 status and medical-related changes. Patients will also be asked if they are hospitalized, if there have been  
546 any accidents, if they have taken any new drugs, or if they have changed their current treatment regimens.  
547 In addition to observations by patients or investigators, AEs should also be recorded from any data that can  
548 be collected (such as laboratory test values and physical examination findings) or safety documents related  
549 to the patient.

550

551 **8.8 Causality assessment of AEs**

552 The researcher's assessment of the causal relationship between AEs and surgical treatment is an important  
553 aspect of the AE record. The correlation analysis between surgery and AEs has the following four  
554 situational outcomes:



- 555 1. Definitely unrelated: There is no connection between the operation and the reported AE;
- 556 2. Possibly related: The treatment caused or promoted the occurrence of the AE; that is, the occurrence of  
557 the AE follows a reasonable time sequence starting from the operation and/or follows known  
558 operation-related reactions, but may also be caused by other factors;
- 559 3. Probably related: There is a clear sequence in the occurrence of the operation and the AE, and may be  
560 related to the operation. This will be based on known or previously reported surgical complications, or  
561 based on the judgment of the investigator's clinical experience; or
- 562 4. Definitely related: There is a clear causal relationship between the operation and the AE, and other  
563 conditions (complications, progression of the disease state, or reaction after medication) cannot explain the  
564 AE.

565

### 566 **8.9 Severity assessment of AEs**

567 The severity of the AE will be scored by the investigator as mild, moderate, or severe according to CTCAE  
568 version 4.0.

569 Changes in the severity of the AE should be recorded so that the duration of the event can be assessed at  
570 each intensity level. AEs characterized by intermittent occurrence need to be recorded in terms of the  
571 occurrence and duration of each AE.

572

### 573 **8.10 Management of AEs**

574 When any subject has an AE/SAE, besides the detailed records, it will be managed in accordance with the  
575 standard treatment measures and requirements of each center.

576

### 577 **8.11 Research management committee**

578 The research management committee includes clinical experts in pancreatic surgery, including the  
579 investigators participating in this trial and members of the hospital ethics committee.

580

## 581 **9. DATA MANAGEMENT**

### 582 **9.1 Case report form**

583 The CRF is a mode of recording clinical data in clinical trials. The researcher should record all relevant  
584 data of each subject in the trial in a timely and truthful manner. The researcher should not change the CRF  
585 data unless the change is really needed. The researcher should sign and indicate the date and reason for the  
586 change. The CRF will be kept by the main investigator after the completion of the trial. The completed CRF  
587 will be reviewed by the clinical monitor, and the content will no longer be modified. To ensure privacy,  
588 each subject's name on the CRF must be abbreviated in Pinyin.

589

### 590 **9.2 Missing data**

591 Bias due to missing data will be investigated by comparing the baseline characteristics of participants with  
592 and without missing values. Depending on the extent of missing levels, the predictors of missing values  
593 will be identified. The primary outcome analysis will be conducted according to the ITT approach and will  
594 be adjusted for the predictors of missing values as part of the sensitivity analysis. In addition, multiple  
595 imputation will be used to impute missing data, and the imputed data will also be analyzed as part of the  
596 sensitivity analyzes.

597

### 598 **9.3 Data monitoring**

599 The efficacy and safety data will be acquired 90 days after the patient signs the informed consent form and  
600 the initial visit. The secure data will be used to evaluate the severity of AEs based on the CTCAE 4.0  
601 standard. All AEs will be recorded on the CRF, from the signing of the informed consent form to the end of  
602 the study. LinkDoc Technology (Beijing, China) will act as the independent third party and will conduct

603 data monitoring throughout the entire trial.

604

#### 605 **9.4 Database construction**

606 Proofreading of records and establishment of the database will be performed by a specific statistician.  
607 Questionable data should be forwarded to the investigator for verification by a clinical research assistant.  
608 The investigator should verify it as soon as possible and return the verified data in time, and record the data  
609 a second time. After the database has been audited, the data will be locked by the main researchers and  
610 statisticians. To ensure data security, irrelevant personnel cannot access and modify the data, and the data  
611 must be backed up. Any data can only be changed after the principal investigator and the data administrator  
612 have signed a consent form.

613

#### 614 **9.5 Data preservation**

615 The various raw data in this trial should be recorded in a timely, true, accurate, and complete manner. All  
616 materials of this clinical trial belong to the Affiliated Tongji Hospital of Tongji Medical College of  
617 Huazhong University of Science and Technology. Other investigators can apply for the use of relevant data  
618 from the main investigators. The investigators are not allowed to provide the data to a third party in any  
619 form.

620

### 621 **10. STATISTICAL ANALYSIS**

#### 622 **10.1 General considerations**

623 The data from this study will be analyzed and reported following the CONSORT guidelines.<sup>20</sup> Before  
624 locking the database, a statistical analysis plan will be issued as a separate document, providing detailed  
625 methods for the analyzes pertaining to this research. Any deviations from the planned analyzes will be  
626 described and justified in the final integrated clinical study report.

627

#### 628 **10.2 Statistical analysis data sets**

629 The full analysis set (FAS), the per-protocol analysis set (PPS), and the safety analysis set (SS) will be  
630 established. The efficacy analysis will be carried out based on the FAS and PPS. Demographics and  
631 baseline characteristics will be analyzed based on the FAS. Safety assessments will be performed using the  
632 SS.

633 **(1) FAS:** Based on the ITT principle, this refers to all patients who will undergo surgical treatment and  
634 who will have the primary outcome evaluation data after treatment.

635 **(2) PPS:** This is a subset of the FAS, and refers to patients who meet the following conditions in the  
636 FAS: (i) the primary outcome evaluation data are complete and (ii) no major protocol violations exist that  
637 will affect the primary outcome evaluation.

638

#### 639 **10.3 Statistical hypothesis**

640 The primary outcome of this study is the 3-year overall survival rate. Assuming that the 3-year overall  
641 survival rate of the LPD group is  $P_1$ , and the 3-year overall survival rate of the OPD group is  $P_2$ , the null  
642 hypothesis ( $H_0$ ) is  $H_0: P_1 - P_2 > -10\%$  and the alternative hypothesis ( $H_1$ ) is:  $H_1: P_1 - P_2 \leq -10\%$ , with an  
643 alpha level of 0.05 (two-sided) and a non-inferiority threshold of -10%.

644 The secondary outcome index and the test level of safety analysis will be performed using a two-sided  $\alpha =$   
645 0.05. Differences with two-sided  $P < 0.05$  are considered to be statistically significant.

646

#### 647 **10.4 General analysis principles**

648 (1) All statistical tests will be performed with a two-sided  $P < 0.05$  considered to represent a statistically  
649 significant difference with a 95% level of significance. All data will be analyzed using SAS version 9.4  
650 (SAS Institute Inc.).

651 (2) Quantitative data will be described as the number of cases, means, standard deviations, medians,  
652 interquartile ranges, and ranges. Qualitative data will be described as frequencies, constituent ratios, or  
653 percentages. In the comparison of effects, we will select the appropriate data set according to the specific  
654 research goal using the appropriate statistical analysis method. Intergroup comparison of qualitative data  
655 will be performed using the  $\chi^2$  test, and the independent samples *t*-test will be used to compare quantitative  
656 data between the groups.

657 (3) The FAS will be used to evaluate the intergroup equivalence of baseline indicators, including  
658 demographic characteristics. Outcomes will be analyzed using the FAS and PPS.

659 (4) Prior to data locking, the data set will be determined together by the principal investigators and the  
660 biostatistician.

661 (5) The SPIRIT checklist was referred to when writing this study protocol.

662

### 663 **10.5 Safety analysis**

664 As mentioned above, the safety analysis will be mainly based on the frequency of AEs, the number of  
665 patients whose laboratory test values fall outside the predetermined range, and the number of patients with  
666 data worthy of clinical attention. Simultaneously, other safety data (such as vital signs and special  
667 examinations) will be considered approximately.

668 The  $\chi^2$  test (including the Cochran–Mantel–Haenszel  $\chi^2$  test) or the Fisher’s exact probability method will  
669 be used in the safety data analysis to compare the incidence of AEs/adverse reactions in each group, and  
670 AEs/adverse reactions that occurred in this analysis will be listed. Normal or abnormal changes in  
671 laboratory inspection results before or after the test and the relationship with the test drug will be  
672 statistically described.

673

### 674 **10.6 Exploratory analysis**

675 According to the actual data collected in this study, the log-rank test will be used to analyze the overall  
676 survival rate according to the pathological stage and other tumor-specific indicators of interest to compare  
677 the survival of patients among different subgroups or characteristics. Other exploratory analyzes will be  
678 further defined according to the research objectives.

679

### 680 **10.7 Special value processing**

681 Subjects who withdraw early or fail to provide sufficient data for any reason will be considered as cases of  
682 early suspension or non-evaluable, and will not be included in the final analysis.

683 For each missing data that cannot be traced back in the analysis, the degree of missingness will first be  
684 determined. For variables with a missingness rate exceeding 5%, the multiple imputation method will be  
685 used to fill in the missing data.

686

## 687 **11. ETHICAL, LEGAL, AND ADMINISTRATIVE ASPECTS**

### 688 **11.1 Ethics approval and consent to participate**

689 Approval from the Institutional Review Board of Tongji Hospital, Tongji Medical College, Huazhong  
690 University of Science and Technology (TJ-IRB20180512) was received in May 2018. All patients will sign  
691 an informed consent document before entering the study. Consent will be obtained by the consultant or  
692 designated team member and preserved by the data collection group. This study has gained ethical approval  
693 at both the central and local levels for each participating center, and central ethical approval has been  
694 confirmed by the Institutional Review Board of Tongji Hospital, Tongji Medical College, Huazhong  
695 University of Science and Technology. Recruitment will not start at other centers in the trial until local  
696 ethical approval has been obtained. Participating in both groups does not imply any additional risk for the  
697 subjects included, since the groups will not be deprived of the application of the most up-to-date  
698 recommendations. Any results from this trial (publications and conference presentations) will be published  
699 in peer-reviewed journals and conference proceedings.

700

701 **11.2 Quality assurance**

702 All aspects of the study will be carefully monitored with respect to Good Clinical Practice and standard  
703 operating procedures for compliance with applicable government regulations. The study monitor will have  
704 access to all records necessary to ensure the integrity of the data and will periodically review the progress  
705 of the study with the principal investigator.

706

707 **11.3 Confidentiality**

708 All study-related information and participant information will be stored securely at the study site in locked  
709 cabinets in areas with limited access. All local databases will be secured with a password-protected access  
710 system.

711

712 **11.4 Archiving study documents**

713 According to the International Conference on Harmonization (ICH) guidelines, essential documents should  
714 be retained for a minimum of two years. These documents may be retained for a longer period according to  
715 applicable legal requirements.

716

717 **11.5 Good clinical practice**

718 The procedures set out in this clinical study protocol are designed to ensure that the investigator abides by  
719 the principles of the ICH guidelines on Good Clinical Practice, and the Declaration of Helsinki (version  
720 1989). The clinical study will also be carried out in keeping with national and local legal requirements.

721

722 **11.6 Informed consent**

723 Before each patient is enrolled in the clinical study, written informed consent will be obtained from him/her  
724 according to the regulatory and legal requirements of the country in which the study is being conducted. As  
725 part of this procedure, the principal investigator or designee must explain orally and in writing the nature,  
726 duration, and purpose of the study, and the procedures to be performed in such a manner that the study  
727 subject is aware of the potential risks, inconveniences, or adverse effects that may occur. The patient should  
728 be informed that he/she is free to withdraw from the study at any time. The principal investigator or  
729 designee will provide the Independent Ethics Committee (IEC)-approved informed consent form prior to  
730 the start of the study. The patient will have time to ask questions before signing the informed consent form.  
731 The information sheet and informed consent document must be signed and dated. One copy will be handed  
732 to the patient and the investigator will retain a copy as part of the clinical study records. The investigator  
733 will not undertake any investigation specifically required only for the clinical study until written consent  
734 has been obtained. The terms of the consent and when it was obtained must also be documented in the CRF.  
735 If a protocol amendment is required, the subject information sheet and informed consent document may  
736 need to be revised to reflect the changes to the protocol. If the subject information sheet and informed  
737 consent document are revised, it must be reviewed and approved by the responsible IEC, and signed by all  
738 subjects subsequently enrolled in the clinical study as well as those currently enrolled.

739

740 **11.7 Protocol approval and amendment(s)**

741 Prior to trial initiation, the clinical study protocol and other relevant documents will be approved by the  
742 IEC, in accordance with local legal requirements. This protocol is to be followed exactly. Any  
743 modifications of the protocol that may impact the conduct of the study, potentially benefitting the patients  
744 or that may affect patient safety, including changes in study design, sample size, and study procedures, will  
745 require a formal protocol amendment. In addition, this would need to be submitted to the IEC, and health  
746 authorities must be notified in accordance with local regulations.

747

748 **11.8 Publication policy**

749 Each participating investigator, with equal rights, will be able to access the data of the registry, perform

750 statistical analyzes, discuss the results, and freely write scientific manuscripts. The manuscript would be  
751 approved by all the authors before publication.

752

### 753 11.9 Consent for publication

754 Written informed consent will be obtained from the patients for publication of their individual details and  
755 accompanying images in this paper. The consent form is held by the authors' institution and is available for  
756 review by the Editor-in-Chief.

757

### 758 12. PROTOCOL COMPLIANCE

759 The researcher will make all due efforts to avoid deviation from the protocol. Under no circumstances  
760 should the investigator contact Tongji Hospital affiliated with Tongji Medical College of Huazhong  
761 University of Science and Technology or the agent who supervises the study to request approval of a plan  
762 deviation, because unauthorized deviations will not be allowed.

763

### 764 13. PROTOCOL REVISION

765 Any changes or additions to the protocol can only take place in the form of a written amendment, which  
766 must be approved by Tongji Hospital of Tongji Medical College of Huazhong University of Science and  
767 Technology, IRB/IEC/REB, and government health departments. Only amendments adopted for patient  
768 safety can be implemented before IRB/IEC/REB approval. Although formal protocol amendments need to  
769 be approved, it is expected that investigators will immediately take necessary measures for the safety of  
770 patients enrolled in this study, even if such measures are a deviation from the protocol. In this case, the  
771 researcher should notify the Tongji Hospital of Tongji Medical College of Huazhong University of Science  
772 and Technology and the IRB/IEC/REB of this measure within 14 workdays.

773

### 774 References

- 775 1. Siegel RL, Miller KD, Jemal A. Cancer statistics, 2019. *Ca-a Cancer Journal for Clinicians*  
776 2019;69(1):7-34. doi: 10.3322/caac.21551
- 777 2. Moore A, Donahue T. Pancreatic Cancer. *Jama* 2019;322(14):1426. doi: 10.1001/jama.2019.14699  
778 [published Online First: 2019/10/09]
- 779 3. Neoptolemos JP, Stocken DD, Tudur Smith C, et al. Adjuvant 5-fluorouracil and folinic acid vs  
780 observation for pancreatic cancer: composite data from the ESPAC-1 and -3(v1) trials. *British*  
781 *journal of cancer* 2009;100(2):246-50. doi: 10.1038/sj.bjc.6604838 [published Online First:  
782 2009/01/08]
- 783 4. Ueno H, Kosuge T, Matsuyama Y, et al. A randomized phase III trial comparing gemcitabine with  
784 surgery-only in patients with resected pancreatic cancer: Japanese Study Group of Adjuvant  
785 Therapy for Pancreatic Cancer. *British journal of cancer* 2009;101(6):908-15. doi:  
786 10.1038/sj.bjc.6605256 [published Online First: 2009/08/20]
- 787 5. Tempero MA, Malafa MP, Chiorean EG, et al. Pancreatic Adenocarcinoma, Version 1.2019. *Journal of*  
788 *the National Comprehensive Cancer Network : JNCCN* 2019;17(3):202-10. doi:  
789 10.6004/jnccn.2019.0014 [published Online First: 2019/03/14]
- 790 6. Pancreatic Cancer Committee of Chinese Anti-Cancer A. Comprehensive guidelines for the diagnosis  
791 and treatment of pancreatic cancer (2018 version). *Zhonghua wai ke za zhi [Chinese journal of*  
792 *surgery]* 2018;56(7):481-94. doi: 10.3760/cma.j.issn.0529-5815.2018.07.001
- 793 7. Are C, Dhir M, Ravipati L. History of pancreaticoduodenectomy: early misconceptions, initial  
794 milestones and the pioneers. *HPB : the official journal of the International Hepato Pancreato*  
795 *Biliary Association* 2011;13(6):377-84. doi: 10.1111/j.1477-2574.2011.00305.x [published Online  
796 First: 2011/05/26]
- 797 8. Gagner M, Pomp A. Laparoscopic pylorus-preserving pancreatoduodenectomy. *Surgical endoscopy*  
798 1994;8(5):408-10. doi: 10.1007/bf00642443 [published Online First: 1994/05/01]
- 799 9. Liu M, Ji S, Xu W, et al. Laparoscopic pancreaticoduodenectomy: are the best times coming? *World*  
800 *journal of surgical oncology* 2019;17(1):81. doi: 10.1186/s12957-019-1624-6 [published Online  
801 First: 2019/05/12]
- 802 10. Zhang H, Wu X, Zhu F, et al. Systematic review and meta-analysis of minimally invasive versus open  
803 approach for pancreaticoduodenectomy. *Surgical endoscopy* 2016;30(12):5173-84. doi:

804 10.1007/s00464-016-4864-3 [published Online First: 2016/03/24]  
805 11. Kamarajah SK, Bundred JR, Alrawashdeh W, et al. A systematic review and network meta-analysis of  
806 phase III randomized controlled trials for adjuvant therapy following resection of pancreatic ductal  
807 adenocarcinoma (PDAC). *HPB : the official journal of the International Hepato Pancreato Biliary*  
808 *Association* 2019 doi: 10.1016/j.hpb.2019.12.001 [published Online First: 2020/01/03]  
809 12. Peng L, Zhou Z, Cao Z, et al. Long-Term Oncological Outcomes in Laparoscopic Versus Open  
810 Pancreaticoduodenectomy for Pancreatic Cancer: A Systematic Review and Meta-Analysis.  
811 *Journal of laparoendoscopic & advanced surgical techniques Part A* 2019;29(6):759-69. doi:  
812 10.1089/lap.2018.0683 [published Online First: 2019/03/06]  
813 13. Bassi C, Marchegiani G, Dervenis C, et al. The 2016 update of the International Study Group (ISGPS)  
814 definition and grading of postoperative pancreatic fistula: 11 Years After. *Surgery*  
815 2017;161(3):584-91. doi: 10.1016/j.surg.2016.11.014 [published Online First: 2017/01/04]  
816 14. Wente MN, Veit JA, Bassi C, et al. Postpancreatectomy hemorrhage (PPH): an International Study  
817 Group of Pancreatic Surgery (ISGPS) definition. *Surgery* 2007;142(1):20-5. doi:  
818 10.1016/j.surg.2007.02.001 [published Online First: 2007/07/17]  
819 15. Wente MN, Bassi C, Dervenis C, et al. Delayed gastric emptying (DGE) after pancreatic surgery: a  
820 suggested definition by the International Study Group of Pancreatic Surgery (ISGPS). *Surgery*  
821 2007;142(5):761-8. doi: 10.1016/j.surg.2007.05.005 [published Online First: 2007/11/06]  
822 16. Koch M, Garden OJ, Padbury R, et al. Bile leakage after hepatobiliary and pancreatic surgery: a  
823 definition and grading of severity by the International Study Group of Liver Surgery. *Surgery*  
824 2011;149(5):680-8. doi: 10.1016/j.surg.2010.12.002 [published Online First: 2011/02/15]  
825 17. Clavien PA, Barkun J, de Oliveira ML, et al. The Clavien-Dindo classification of surgical complications:  
826 five-year experience. *Annals of surgery* 2009;250(2):187-96. doi:  
827 10.1097/SLA.0b013e3181b13ca2 [published Online First: 2009/07/30]  
828 18. Slankamenac K, Graf R, Barkun J, et al. The comprehensive complication index: a novel continuous  
829 scale to measure surgical morbidity. *Annals of surgery* 2013;258(1):1-7. doi:  
830 10.1097/SLA.0b013e318296c732 [published Online First: 2013/06/04]  
831 19. Asbun HJ, Conlon K, Fernandez-Cruz L, et al. When to perform a pancreatoduodenectomy in the  
832 absence of positive histology? A consensus statement by the International Study Group of  
833 Pancreatic Surgery. *Surgery* 2014;155(5):887-92. doi: 10.1016/j.surg.2013.12.032 [published  
834 Online First: 2014/03/26]  
835 20. Moher D, Hopewell S, Schulz KF, et al. CONSORT 2010 explanation and elaboration: updated  
836 guidelines for reporting parallel group randomized trials. *BMJ (Clinical research ed)*  
837 2010;340:c869. doi: 10.1136/bmj.c869 [published Online First: 2010/03/25]  
838

839

840

841

842

843

844

845

846

847

848

849

850

851

852

853

854 **Statistical analysis plan**

855

856

Version no. V3.0  
Version date 2018-03-20

857

858

Protocol title: Effect of laparoscopic versus open pancreaticoduodenectomy on overall survival in patients with resectable pancreatic cancer (TJDBPS07): A study protocol for a multicenter, randomized controlled clinical trial

Protocol number: TJDBPS07

Investigating institute: Tongji Hospital, Tongji Medical College, Huazhong University of Science and Technology

Statistical analysis institute: Tongji Medical College, Huazhong University of Science and Technology

859

860

861 **Statistical analysis plan**  
862 **Signature page of investigating institute**

863  
864

865 **I, hereby, sign here to declare that I have read the statistical analysis plan (version 3.0) in detail and**  
866 **agree to analyze and summarize the safety and efficacy data of the laparoscopic and open**  
867 **pancreaticoduodenectomy study in accordance with the statistical analysis plan.**

868

869 **Investigating institute:** Tongji Hospital, Tongji Medical College, Huazhong University of Science and  
870 Technology

871

872

873

874 **Principal investigator (Sign)** \_\_\_\_\_ **Date** \_\_\_\_\_

875

876

877



878 **1. Overview**

879 **1.1 Objective**

880 The broad goal of this trial is to evaluate the long-term and short-term safety and efficacy of  
881 laparoscopic pancreaticoduodenectomy (LPD) and open pancreaticoduodenectomy (OPD) procedures  
882 for the treatment of pancreatic cancer.

883 **1.2 Design**

884 The TJDBPS07 trial is characterized as a prospective, multicenter, randomized controlled,  
885 non-inferiority, and open labelled study with two parallel groups and overall survival as the primary  
886 outcome.

887 **1.3 Study details**

888 Screening and identification of eligible patients will take place within the pancreatic multidisciplinary  
889 team (MDT) of each participating center.

890 All adult patients with histologically proven pancreatic cancer or a preoperative clinical diagnosis of  
891 pancreatic cancer without histopathologic proof, and for whom the indication for  
892 pancreaticoduodenectomy (PD) will be evaluated, will be informed of their eligibility to take part in the  
893 study.

894 After the consent form is signed, participants will be randomized into the LPD or OPD group in a 1:1  
895 allocation.

896 Postoperative short-term follow-up will be carried out at 1 day, 1 week, 1 month, 3 months, and 6  
897 months after surgery. Long-term follow-up will be carried out every 3 months in the first year after  
898 surgery and every 6 months from the second year onwards. All patients will be followed up for a period  
899 of five years. All the patients will be free to participate in this study and can decide to withdraw at any  
900 time.

901

902 **2. Outcome measures**

903 **2.1 Primary outcome**

904 The primary outcome is the 5-year overall survival rate.

905 **2.2 Secondary outcomes**

906 The secondary outcomes include the following variables:

907 1. Long-term outcomes: the 3-year overall survival rate, 5-year disease-free survival rate, and 3-year  
908 disease-free survival rate;

909 2. Intraoperative-related indicators: operation time, intraoperative blood loss, intraoperative blood  
910 transfusion, pancreatojejunostomy, gastrointestinal anastomosis, gastrointestinal anastomosis time, and  
911 pancreatic duct diameter;

912 3. Intraoperative complications: bile duct injury and nerve injury;

913 4. Perioperative indicators: postoperative hospital stay, intensive care unit stay, time to get out of bed,  
914 time to resumption of oral feeding, time to removal of drainage tube, postoperative drainage fluid  
915 volume, and amylase level;

916 5. Postoperative pain and analgesic consumption: visual analogue scale pain score and analgesic  
917 consumption;

918 6. Postoperative complications: postoperative pancreatic fistula, postoperative hemorrhage, delayed  
919 gastric emptying, systemic inflammatory response syndrome, abdominal infection, reoperation,  
920 Clavien–Dindo classification, and comprehensive complication index score;

921 7. Short-term outcomes: 30/90-day mortality rate and 90-day unplanned readmission rate;

- 922 8. Quality of life: changes in the patient's quality of life before surgery, after discharge, and 6 months  
923 after surgery; and  
924 9. Economic indicators: surgical expenses and hospitalization expenses.  
925

### 926 **3. Statistical analysis data sets**

927 The modified intention-to-treat set (mITT), per-protocol analysis set (PPS), and safety analysis set (SS)  
928 will be established. The efficacy analysis will be carried out based on the mITT and PPS. Demographic  
929 and baseline characteristics will be analyzed based on the full analysis set (FAS). Safety assessments  
930 will be performed on the SS.

931 **(1) mITT:** Based on the intention-to-treat principle, all patients who received surgical treatment and  
932 have the primary outcome evaluation data after treatment.

933 **(2) PPS:** This is a subset of the FAS, which includes patients who meet the following conditions: (i) the  
934 primary outcome evaluation data are complete and (ii) no major protocol violations exist that will  
935 affect the primary outcome evaluation.

936 **(3) SS:** All patients subjected to surgery will be included.  
937

### 938 **4. Missing data**

939 The primary outcome analysis will be performed according to the intention-to-treat principle and will  
940 be adjusted for the predictors of missing values as part of the sensitivity analysis. In addition, multiple  
941 imputation will be applied to variables with missing data. The imputed data will also be analyzed as  
942 part of the sensitivity analyzes.  
943

## 944 **5. Statistical plan**

### 945 **5.1 Sample size**

946 This study is a randomized parallel controlled non-inferiority design clinical trial with a 1:1 ratio  
947 between groups. With reference to the results of previously published clinical studies, the 3-year  
948 overall survival rates for patients with malignant pancreatic head tumors who underwent OPD and LPD  
949 are 31% and 41%, respectively. Assuming a non-inferiority cut-off value of -10%, a one-sided  
950 significance level of 0.025, and that a 0.85 degree of power should be obtained, a total of 180 patients  
951 are required for the two groups (90 patients in each group). Considering a drop-out rate of 10%, the  
952 sample size of the study was finally estimated to be 200 patients, with 100 patients in each group.

### 953 **5.2 General analysis principles**

954 (1) All statistical tests will be performed with a two-sided  $P < 0.05$  considered to represent a statistically  
955 significant difference, with a 95% level of significance. All data will be analyzed using SAS version  
956 9.4 (SAS Institute Inc., Cary, NC, USA).

957 (2) All analyzes will be performed separately for the LPD and OPD groups.

958 (3) The mITT set will be used to evaluate the intergroup equivalence of baseline indicators including  
959 demographic characteristics. The outcomes will be analyzed using the mITT and PPS sets.

960 (4) Descriptive quantitative variables will be described as the mean, standard deviation, 95%  
961 confidence intervals of means, ranges, interquartile ranges, median, and number of observations. For  
962 categorical variables frequencies and percentages will be given for all values or categories. Exact 95%  
963 Clopper–Pearson confidence intervals will be provided for key categorical variables.

964 (5) Kaplan–Meier analysis of time to event variables.

965 (6) Multivariable analysis of time to event variables by means of Cox proportional hazards models. The

966 independent variables to be used will be specified in the final statistical analysis plan.  
967 (7) All analyzes are regarded as exploratory; therefore, no significance level is fixed.  
968 (8) Prior to data locking, the data set will be determined together by the principal investigators and the  
969 biostatistician.  
970 (9) The SPIRIT checklist was referred to when writing this study protocol.  
971 **5.3 Efficacy analysis**  
972 The statistical analysis of efficacy will consist of:  
973 (1) Kaplan–Meier analysis of disease-free survival and overall survival  
974 (2) Multivariable analysis of progression-free survival and overall survival by means of Cox  
975 proportional hazards models  
976 (3) Estimation with exact 95% confidence intervals of year-specific survival rates and year-specific  
977 disease-free survival rates  
978 (4) Descriptive analysis of the other perioperative-related indicators  
979 (5) Determination of rate differences and corresponding 95% confidence intervals between the two  
980 groups calculated using the Newcombe method  
981 (6) Comparison of surgical and disease-related characteristics, as well as outcomes, between the two  
982 groups using the *t*-test for continuous data, the Mann–Whitney *U* test for variables with non-parametric  
983 distributions, and the chi-squared or Fisher’s exact tests for categorical data, as appropriate.

984 **Informed consent**

985 **Information page**

986 Dear Mrs/Mr,

987 First of all, thank you for your interest in our clinical research! We invite you to participate in a  
988 randomized controlled clinical trial of laparoscopic versus open pancreaticoduodenectomy for  
989 resectable pancreatic cancer. Before you decide whether to participate in this study, please read the  
990 following as much as possible to help you understand the research, its purpose, the research process  
991 and deadlines, and what may occur after you participate in this study, which may be benefits, risks or  
992 discomfort. If you prefer, you can also discuss it with your family, friends, or ask your doctor for an  
993 explanation.

994

995 **Research introduction**

996 **I. Research background and purposes**

997 **1. Research background**

998 Pancreatic cancer is estimated to rank ninth among the most common cancers and fourth among the  
999 leading causes of cancer deaths in the United States. Surgery (laparotomy or minimally invasive  
1000 surgery) is the only potentially curative and preferred treatment for patients with pancreatic malignant  
1001 tumors. Previously reported studies have indicated that adjuvant chemotherapy after radical surgery  
1002 could significantly enhance the curative effect and achieve promising improvements in overall survival  
1003 and disease-free survival for patients with resected pancreatic adenocarcinoma. As recommended by  
1004 the National Comprehensive Cancer Network (NCCN) Guidelines for Pancreatic Adenocarcinoma  
1005 (version 1.2019) and the Pancreatic Cancer Committee of the Chinese Anti-Cancer Association, radical  
1006 surgery followed by adjuvant chemotherapy based on gemcitabine is a preferred and effective treatment  
1007 strategy for patients with pancreatic cancer.

1008 Pancreaticoduodenectomy (PD), the standard procedure for resectable masses in the periampullary  
1009 region, including pancreatic head cancer, is considered one of the subtlest abdominal surgical  
1010 procedures, involving both difficult resection and complex reconstruction procedures. Since first  
1011 performed and introduced by Gagner et al. in 1994, laparoscopic PD (LPD) has rapidly and widely  
1012 spread owing to its potential technical advantages focusing on the precision of movements and  
1013 three-dimensional view. Recently, an increasing number of studies, including some large-scale  
1014 multicenter randomized controlled trials have reported the safety and feasibility of LPD for the  
1015 treatment of periampullary tumors. In addition, several reports have focused on the comparison of LPD  
1016 and open PD (OPD) in the treatment of pancreatic cancer. The results suggest that LPD yielded  
1017 equivalent 5-year overall survival and superior perioperative clinical outcomes in comparison to OPD.  
1018 However, these reports were from retrospective studies, which are associated with inherent limitations  
1019 such as patient selection biases, missing or incomplete data, and variables that were unaccounted for,  
1020 making the results difficult to interpret definitively.

**Effect of laparoscopic versus open pancreaticoduodenectomy on overall survival in patients with resectable pancreatic cancer (TJDBPS07): A multicenter, randomized controlled clinical trial**

Informed consent

Version date 2018-12-01

Version 1.0

1021 Accordingly, it is imperative to conduct prospective large-scale multicenter randomized controlled  
1022 trials to analyze outcomes of interest and obtain high-level evidence. This TJDBPS07 trial aims to  
1023 compare the long-term oncological outcomes and short-term surgical outcomes of LPD and OPD in the  
1024 treatment of pancreatic cancer.

1025 **2. Research purposes**

1026 The purpose of this study is to evaluate the efficacy and safety of LPD for resectable pancreatic cancer  
1027 compared with OPD.

1028 **3. Study participants and expected number of participants**

1029 This study will be conducted at 10 medical centers all over China. The number of participants in this  
1030 study is expected to be 200.

1031

1032 **II. Who can participate in this study?**

1033 Patients with the following characteristics can participate in the study:

- 1034 1) Age between 18 years and 75 years.  
1035 2) Histologically confirmed or clinically diagnosed pancreatic cancer by an MDT without  
1036 histopathologic evidence.  
1037 3) Patients feasible to undergo both LPD and OPD according to MDT evaluations.  
1038 4) Patients understanding and willing to comply with this trial.  
1039 5) Provision of written informed consent before patient registration.  
1040 6) Patients meeting the curative treatment intent in accordance with clinical guidelines.

1041

1042 **III. Who is not suitable for research?**

1043 Patients with any of the following characteristics are not suitable for this study:

- 1044 1) Patients with distant metastases, including peritoneal, liver, distant lymph node metastases, and  
1045 involvement of other organs.  
1046 2) Patients requiring left, central or total pancreatectomy or other palliative surgery.  
1047 3) Preoperative American Society of Anesthesiologists score  $\geq 4$ .  
1048 4) History of other malignant disease.  
1049 5) Pregnant or breast-feeding women.  
1050 6) Patients with serious mental disorders.  
1051 7) Patients treated with neoadjuvant therapy.  
1052 8) Patients with vascular invasion and requiring vascular resection as evaluated by the MDT team  
1053 according to abdominal imaging data.

1054 9) Body mass index > 35 kg/m<sup>2</sup>.

1055 10) Patients participating in any other clinical trials within 3 months.

1056

#### 1057 **IV. What will be done if you participate in the research?**

1058 If you meet the inclusion criteria and agree to participate, you will be evaluated according to the  
1059 following steps. You will be allocated to one of two groups according to the study plan to undergo  
1060 either laparoscopic and open surgery. Both groups will undergo pancreaticoduodenectomy and you may  
1061 be assigned to either group. During enrolment or surgical operation, your interests will be the first  
1062 consideration. All patients will undergo routine nursing typical for patients undergoing biliary and  
1063 pancreatic surgery. Various study parameters will be collected before, during, and after surgery,  
1064 including but not limited to routine blood parameters, blood biochemistry parameters, tumor marker  
1065 estimation, estimated blood loss, anastomosis characteristics, and complications. The researchers will  
1066 conduct safety and efficacy assessments and judgments. Patients histologically diagnosed with  
1067 pancreatic cancer will undergo six cycles of adjuvant chemotherapy recommended in the NCCN  
1068 guideline within six months postoperatively, and will be subjected to follow-up for 60 months. The  
1069 time points of follow-up are 3, 6, 9, 12, 18, 24, 30, 36, 42, 48, 54, and 60 months after discharge.  
1070 Follow-up will be conducted on the ward and via telephone follow-up. The follow-up will include  
1071 assessments of each patient's condition, treatment, medications being received, and any adverse events.

1072

#### 1073 **V. Possible benefits of participating in the study**

1074 Although there is already evidence that pancreaticoduodenectomy is satisfactory for treatment, this  
1075 does not guarantee that it will work for you. The open and laparoscopic methods used in this study are  
1076 not the only existing treatments. If your condition is not improving, you can ask your doctor about  
1077 alternative treatments that are possible.

1078

#### 1079 **VI. Adverse reactions, risks, and protective measures for participating in the** 1080 **study**

1081 During the trial, if there is any discomfort in the study, or your condition changes, or any unexpected  
1082 situation, regardless of whether it is related to treatment, you should promptly notify your doctor, who  
1083 will make an accurate judgment regarding medical treatment. The main adverse reactions and risks are  
1084 as follows:

1085 1. In the operation, the surgical method is determined according to medical conditions;

1086 2. Due to differences in the patient's condition (critical, complicated, or poor systemic conditions)  
1087 and individual differences, sudden situations may occur during and after surgery, including multiple  
1088 organ failure (such as heart failure, respiratory failure, liver failure, renal failure, or disseminated  
1089 intravascular coagulation) and unpredictable changes in the condition that may be life-threatening;

1090 3. Major bleeding and hemorrhagic shock may occur during surgery, and is life-threatening;

**Effect of laparoscopic versus open pancreaticoduodenectomy on overall survival in patients with resectable pancreatic cancer (TJDBPS07): A multicenter, randomized controlled clinical trial**

Informed consent

Version date 2018-12-01

Version 1.0

- 1091 4. Operations due to anatomical variations and severe adhesions for therapeutic purposes. Damage  
1092 to surrounding and nearby tissues and organs may be inevitable, and the corresponding organs need to  
1093 be repaired or reconstructed;
- 1094 5. Special medical supplies such as chemotherapy pumps and anastomotic devices may be used  
1095 during surgery, and special treatments such as radiofrequency therapy and cryotherapy may be  
1096 administered during surgery;
- 1097 6. Patients with tumors may not be able to undergo surgical resection due to the condition, or  
1098 recurrence and metastasis after resection, requiring further treatment;
- 1099 7. Recurrent bleeding after surgery, local/systemic infection, bile leakage, pancreatic leakage,  
1100 intestinal leakage, anastomotic leakage, and other changes in the condition may be life-threatening and  
1101 require reoperation;
- 1102 8. Other unforeseen or unpredictable adverse consequences and medical risks;
- 1103 9. Admission to the intensive care unit, if necessary, after surgery;
- 1104 10. Postoperative examination findings may be inconsistent with preoperative diagnosis and  
1105 intraoperative diagnosis. The final diagnosis is based on the findings of postoperative examination;
- 1106 11. Determine the risk of biopsy of the lesion under the endoscope under the conditions of the  
1107 operation;
- 1108 12. During the operation, malignant tumor metastasis is found, and it is difficult to cure radically.  
1109 The risk of radical resection is high. Only palliative anastomosis is possible;
- 1110 13. During the operation, the abdominal cavity is widely invaded, and it is not possible to perform  
1111 resection or palliative anastomosis;
- 1112 14. Postoperative abdominal adhesions, intestinal adhesions, and intestinal obstruction may  
1113 require relevant treatment;
- 1114 15. Long-term bed rest, pulmonary infection, and deep vein thrombosis may occur;
- 1115 16. Incision healing may occur after surgery, with infection of the incision, incision splitting,  
1116 incisional hernia, etc.;
- 1117 17. Exocrine pancreatic insufficiency;
- 1118 18. LPD may result in tissue adhesion, intraoperative bleeding, etc.; and
- 1119 19. Pneumoperitoneum.

1120 **Protective measures:** If patients participating in the trial have the above complications, they will be  
1121 contacted by a professional medical team to deal with and treat them for the first time.

1122

## 1123 **VII. Relevant costs**

1124 The costs of patient's follow-up examination, including abdominal color Doppler ultrasound,  
1125 abdominal computed tomography and adjuvant therapy, chemotherapy, and other costs will be

**Effect of laparoscopic versus open pancreaticoduodenectomy on overall survival in patients with resectable pancreatic cancer (TJDBPS07): A multicenter, randomized controlled clinical trial**

Informed consent

Version date 2018-12-01

Version 1.0

1126 subsidized or even waived on a situational basis. If an adverse event occurs in the clinical trial, the  
1127 Medical Expert Committee will determine if it is related to the surgery or trial. The costs of treatments  
1128 and examinations required for other co-existing diseases will not be covered.

1129

1130 **VIII. Confidentiality of clinical data**

1131 Your medical records (research medical records, case report forms, test results, etc.) will be kept  
1132 entirely at the hospital where you are attending. The doctor will record the results of all tests on your  
1133 medical record. Researchers, ethics committees, and higher-level medical administrations will be  
1134 allowed to access your medical records. Any public report about the results of this study will not  
1135 disclose your personal identity. We will make every effort to protect the privacy of your personal  
1136 medical information to the extent permitted by law.

1137 According to medical research ethics, in addition to personal privacy information, experimental data  
1138 will be available for public inquiry and sharing. Query and sharing will be limited to web-based  
1139 electronic databases, ensuring that no personal private information will be disclosed.

1140

1141 **IX. How can I get more information?**

1142 You can ask any questions about this research at any time and get answers.

1143 If there is any important new information during the study that may affect your willingness to continue  
1144 participating, your doctor will notify you in a timely manner.

1145

1146 **X. You can voluntarily choose to participate in the research or withdraw from  
1147 the study**

1148 The decision regarding whether or not to participate in the research is entirely up to you. You may  
1149 decline to participate in the study or withdraw at any time. This will not affect your relationship with  
1150 the doctor and will not affect your medical or other benefits.

1151 For your best interest, your doctor or researcher may discontinue your participation in this study at any  
1152 time during the course of your research.

1153

1154 **XI. What should I do now?**

1155 Participation in this clinical study is based on a completely voluntary principle and needs to be carried  
1156 out with your consent and signed informed consent. The decision regarding whether or not you  
1157 participate in this clinical study is entirely based on your own wishes. You have the right to suspend  
1158 participation and withdraw from the study treatment at any time. Exiting this study will not affect your  
1159 medical treatment.

1160 Your physician may suspend your participation in this study in advance if your health condition makes  
1161 you not suitable for continued participation or you do not comply with the research program  
1162 requirements.



**Effect of laparoscopic versus open pancreaticoduodenectomy on overall survival in patients with resectable pancreatic cancer (TJDBPS07): A multicenter, randomized controlled clinical trial**

Informed consent

Version date 2018-12-01

Version 1.0

---

1163 The doctor will promptly notify you or your legal representative if there is medical information that  
1164 may affect your willingness to continue participating during the course of the study. Before you make a  
1165 decision to participate in this study, please ask as many questions as possible until you fully understand  
1166 the study treatments

1167

## **Informed consent**

1168

## **Signature page**

1169

1170 **Clinical research project: Effect of laparoscopic versus open pancreaticoduodenectomy on overall**  
1171 **survival in patients with resectable pancreatic cancer (TJDBPS07): A multicenter, randomized**  
1172 **controlled clinical trial**

1173

1174 **Research center name:** \_\_\_\_\_

1175

1176 I have carefully read the contents of the informed consent form, and the researchers have answered my  
1177 questions.

1178

1179 I fully participated in the study and fully cooperated with the researcher after fully understanding the  
1180 purpose, methods, possible therapeutic benefits and possible risks, and other provisions mentioned in  
1181 the informed consent form.

1182

1183 I understand that I can withdraw from the study at any time and I do not need to provide any reason.  
1184 The medical services I receive and the legal rights I enjoy are not affected at all.

1185

1186 Finally, I decided to agree to participate in this study and to ensure compliance with my doctor's  
1187 advice.

1188

1189 Subject's signature: \_\_\_\_\_ Date: \_\_\_\_\_

1190

1191 Contact Number: \_\_\_\_\_

1192

1193 I have explained fully detail to the participant, including the potential risks.

1194

1195 Doctor's signature: \_\_\_\_\_ Date: \_\_\_\_\_

1196

1197 Contact number: \_\_\_\_\_
