# Supplementary material
Source: PubMed Central journal article supplement (PMC10600717)
Supplement: jamasurg-e235210-s002.pdf [file jamasurg-e235210-s002.pdf]

## Supplemental Online Content

Wang M, Pan S, Qin T, et al. Short-term outcomes following laparoscopic vs open pancreaticoduodenectomy in patients with pancreatic ductal adenocarcinoma: a randomized clinical trial. *JAMA Surg*. Published online October 25, 2023.  
doi:10.1001/jamasurg.2023.5210

**eTable 1.** Postoperative Complications among as-treat analysis

**eTable 2.** Information of participating surgeons

**eTable 3.** Outcomes of adjuvant therapy (mITT and PP Analysis)

This supplemental material has been provided by the authors to give readers additional information about their work.

**eTable 1.** Postoperative Complications among as-treat analysis

| Characteristic                    | As treat analysis (n=200) |                      |                             |         |
|-----------------------------------|---------------------------|----------------------|-----------------------------|---------|
|                                   | LPD Group<br>(n=100)      | OPD Group<br>(n=100) | Risk difference<br>(95% CI) | p value |
| Overall complications             | 46 (46.0%)                | 54 (54.0%)           | -8.0% (-0.2%~5.8%)          | 0.26    |
| Clavien-Dindo classification ≥III | 17 (17.0%)                | 23 (23.0%)           | -6.0% (-17.1%~5.1%)         | 0.29    |
| CCI score                         | 0.0 (0.0-22.6)            | 8.7 (0.0-26.2)       | -0.6(-5.0~3.8)              | 0.79#   |
| Postoperative pancreatic fistula  | 23 (23.0%)                | 26 (26.0%)           | -3.0% (-14.9%~8.9%)         | 0.62    |
| Grade B/C                         | 8 (8.0%)                  | 10 (10.0%)           | -2.0% (-9.9%~5.9%)          | 0.62    |
| Postoperative bile leakage        | 14 (14.0%)                | 13 (13.0%)           | 1.0% (-8.5%~10.5%)          | 0.84    |
| Grade B/C                         | 4 (4.0%)                  | 5 (5.0%)             | -1.0% (-6.7%~4.7%)          | 0.73    |
| Delayed gastric emptying          | 26 (26.0%)                | 31 (31.0%)           | -5.0% (-17.5%~7.5%)         | 0.43    |
| Grade B/C                         | 9 (9.0%)                  | 10 (10.0%)           | -1.0% (-9.1%~7.1%)          | 0.81    |
| Postpancreatectomy hemorrhage     | 7 (7.0%)                  | 5 (5.0%)             | 2.0% (-4.6%~8.6)            | 0.55    |
| Grade B/C                         | 7 (7.0%)                  | 5 (5.0%)             | 2.0% (-4.6%~8.6%)           | 0.55    |
| Intra-abdominal infection         | 16 (16.0%)                | 15 (15.0%)           | 1.0(-9.0%~11.0%)            | 0.85    |
| Reoperation                       | 3 (3.0%)                  | 2 (2.0%)             | 1.0% (-3.3%~5.3%)           | 0.50*   |
| Hospital readmission (90 days)    | 0 (0.0%)                  | 2 (2.0%)             | -2.0% (-4.7%~0.7%)          | 0.16*   |
| Mortality (within 30 days)        | 1 (1.0%)                  | 0 (0.0%)             | 1.0% (-1.0%~3.0%)           | >0.99*  |
| Mortality (within 90 days)        | 2 (2.0%)                  | 0 (0.0%)             | 2.0% (-0.7%~4.7%)           | 0.50*   |

CCI, comprehensive complication index; LPD, laparoscopic pancreatoduodenectomy; OPD, open pancreatoduodenectomy; ITT, intention-to-treat; PP, per-protocol. Data are shown as n (%), or median (interquartile range);

# Wilcoxon rank-sum test.

\* Fisher's exact test.

† The mean difference and 95%CI.

**eTable 2.** Information of participating surgeons

| Participating surgeon | Participating center                                                                   | Participating in TJDBPS01 | Number of LPDs performed by the surgeon before Sept. 2019 |
|-----------------------|----------------------------------------------------------------------------------------|---------------------------|-----------------------------------------------------------|
| Renyi Qin             | Tongji Hospital, Tongji Medical College, Huazhong University of Science and Technology | Yes                       | 534                                                       |
| Xianjun Yu            | Fudan University Shanghai Cancer Center                                                | No                        | 212                                                       |
| Xiaobing Huang        | The Second Affiliated Hospital of Army Medical University                              | Yes                       | 256                                                       |
| Jun Liu               | Shandong Provincial Hospital Affiliated to Shandong First Medical University           | Yes                       | 454                                                       |
| Xuemin Chen           | The Third Affiliated Hospital of Soochow University                                    | Yes                       | 321                                                       |
| Wenxing Zhao          | Affiliated Hospital of Xuzhou Medical University                                       | Yes                       | 423                                                       |
| Jingdong Li           | Affiliated Hospital of North Sichuan Medical College                                   | Yes                       | 133                                                       |
| Dewei Li              | The First Affiliated Hospital of Chongqing Medical University                          | Yes                       | 274                                                       |
| Jianhua Liu           | The Second Hospital of Hebei Medical University                                        | Yes                       | 579                                                       |
| Yahui Liu             | The First Hospital of Jilin University                                                 | Yes                       | 482                                                       |

**eTable 3.** Outcomes of adjuvant therapy (mITT and PP Analysis)

| Characteristics                 | mITT (n=200)      |                   |         | PP (n=188)       |                  |         |
|---------------------------------|-------------------|-------------------|---------|------------------|------------------|---------|
|                                 | LPD Group (n=100) | OPD Group (n=100) | p value | LPD Group (n=94) | OPD Group (n=94) | p value |
| Adjuvant therapy                | 82(82.0%)         | 82(82.0%)         | >0.99   | 78(82.1%)        | 81(82.7%)        | 0.92    |
| Time to adjuvant therapy (days) | 41.5 (35.0-53.0)  | 43.0 (32.0-57.0)  | 0.36    | 40.5(34.0~51.0)  | 43.0(32.0~57.0)  | 0.34    |
