# Supplementary material
Source: PubMed Central journal article supplement (PMC10600717)
Supplement: jamasurg-e235210-s003.pdf [file jamasurg-e235210-s003.pdf]

## Data Sharing Statement

### Data

**Data available:** Yes

**Data types:** Deidentified participant data

**How to access data:** All individual participant data collected during this trial after de-identification would be shared. For investigators whose proposed use of the data has been approved by an independent review committee as well as the hospital clinical research department of Tongji Hospital, Tongji Medical College, Huazhong University of Science and Technology, Wuhan identified for this purpose, proposals or written requests could be directed to [ryqin@tjh.tjmu.edu.cn](mailto:ryqin@tjh.tjmu.edu.cn) to gain access. Researchers who request data will need to sign a data access agreement.

**When available:** With publication

### Supporting Documents

**Document types:** Statistical/analytic code, Informed consent form

**How to access documents:** In the supplementary files.

**When available:** With publication

### Additional Information

**Who can access the data:** Researchers whose proposed use of the data has been approved

**Types of analyses:** exploratory analysis

**Mechanisms of data availability:** All individual participant data collected during this trial after de-identification would be shared. For investigators whose proposed use of the data has been approved by an independent review committee as well as the hospital clinical research department of Tongji Hospital, Tongji Medical College, Huazhong University of Science and Technology, Wuhan identified for this purpose, proposals or written requests could be directed to [ryqin@tjh.tjmu.edu.cn](mailto:ryqin@tjh.tjmu.edu.cn) to gain access. Researchers who request data will need to sign a data access agreement.
